# Supplementary material for: Integrative metagenomic and metabolomic analyses reveal severity-specific signatures of gut microbiota in chronic kidney disease
Source: PubMed Central journal article supplement (PMC7196299; doi:10.7150/thno.41725), 2020-04-06
Supplement: thnov10p5398s1.pdf [file thnov10p5398s1.pdf]

## **Integrative metagenomic and metabolomic analyses reveal severity-specific signatures of gut microbiota in chronic kidney disease**

**I-Wen Wu<sup>1,2</sup>, MD; Sheng-Siang Gao<sup>3</sup>, MS; Hsin-Cheng Chou<sup>3</sup>, BS; Huang-Yu Yang<sup>2,4,5</sup>, MD, PhD; Lun-Ching Chang<sup>6</sup>, PhD; Yu-Lun Kuo<sup>7</sup>, PhD; Michael Cong Vinh Dinh<sup>8</sup>, BS; Wen-Hung Chung<sup>9</sup>, MD, PhD; Chi-Wei Yang<sup>2,4</sup>, MD; Hsin-Chih Lai<sup>10,11,12</sup>, PhD; Wen-Ping Hsieh<sup>3</sup>, PhD; Shih-Chi Su<sup>9,#</sup>, PhD**

<sup>1</sup>Department of Nephrology, Chang Gung Memorial Hospital, Keelung, Taiwan

<sup>2</sup>College of Medicine, Chang Gung University, Taoyuan, Taiwan

<sup>3</sup>Institute of Statistics, National Tsing-Hua University, Hsinchu, Taiwan

<sup>4</sup>Kidney Research Center, Department of Nephrology, Chang Gung Memorial Hospital, Linkuo, Taiwan

<sup>5</sup>Department of Health Policy and Management, Johns Hopkins Bloomberg School of Public Health, Baltimore, Maryland, US

<sup>6</sup>Department of Mathematical Sciences, Florida Atlantic University, Florida, US

<sup>7</sup>Biotoools, Co., Ltd, New Taipei City, Taiwan

<sup>8</sup>Department of Computer Science, Florida Atlantic University, Florida, US

<sup>9</sup>Whole-Genome Research Core Laboratory of Human Diseases, Chang Gung Memorial Hospital, Keelung, Taiwan

<sup>10</sup>Department of Medical Biotechnology and Laboratory Science, and Microbiota Research Center, College of Medicine, Chang Gung University, Taoyuan, Taiwan

<sup>11</sup>Central Research Laboratory, XiaMen Chang Gung Hospital, XiaMen, China

<sup>12</sup>Department of Laboratory Medicine, Chang Gung Memorial hospital, Linkuo, Taiwan

**#Corresponding author: Shih-Chi Su, PhD**

Whole-Genome Research Core Laboratory of Human Diseases, Chang Gung Memorial Hospital, Keelung, Taiwan.

222, Mai-Chin Road, Keelung 20401, Taiwan; Phone: 886-2-24329292-3388; Fax: +886-2-27191623; Email: [ssu1@cgmh.org.tw](mailto:ssu1@cgmh.org.tw)

## Supplemental information

### *Shotgun metagenome sequencing of stool DNA and taxonomic profiling*

To obtain metagenomic profiles, we sequenced 92 DNA samples from stool to 7.09 gigabyte (Gb) per sample in average. Following quality control and removal of host sequence reads, an average of 6.51 Gb of microbial reads were collected per sample (ranging from 5.81 to 9.44 Gb). The bacterial sequencing reads from all 92 samples were pooled and *de novo* assembled into a set of 4,685,777 contigs that together comprise the metagenome (**Table S3**), with a N50 of 2,650 bp. The total length of assembled contigs is 4153.9 Mbp (**Figure S2A**), and the GC content of which is 47.45% (**Figure S2B**). Clustering of assembled contigs generated 904 phylogenetic bins. A total of 357 bins was assigned to the species level, from which 213 unique species-level clades were annotated (**Table S4**).

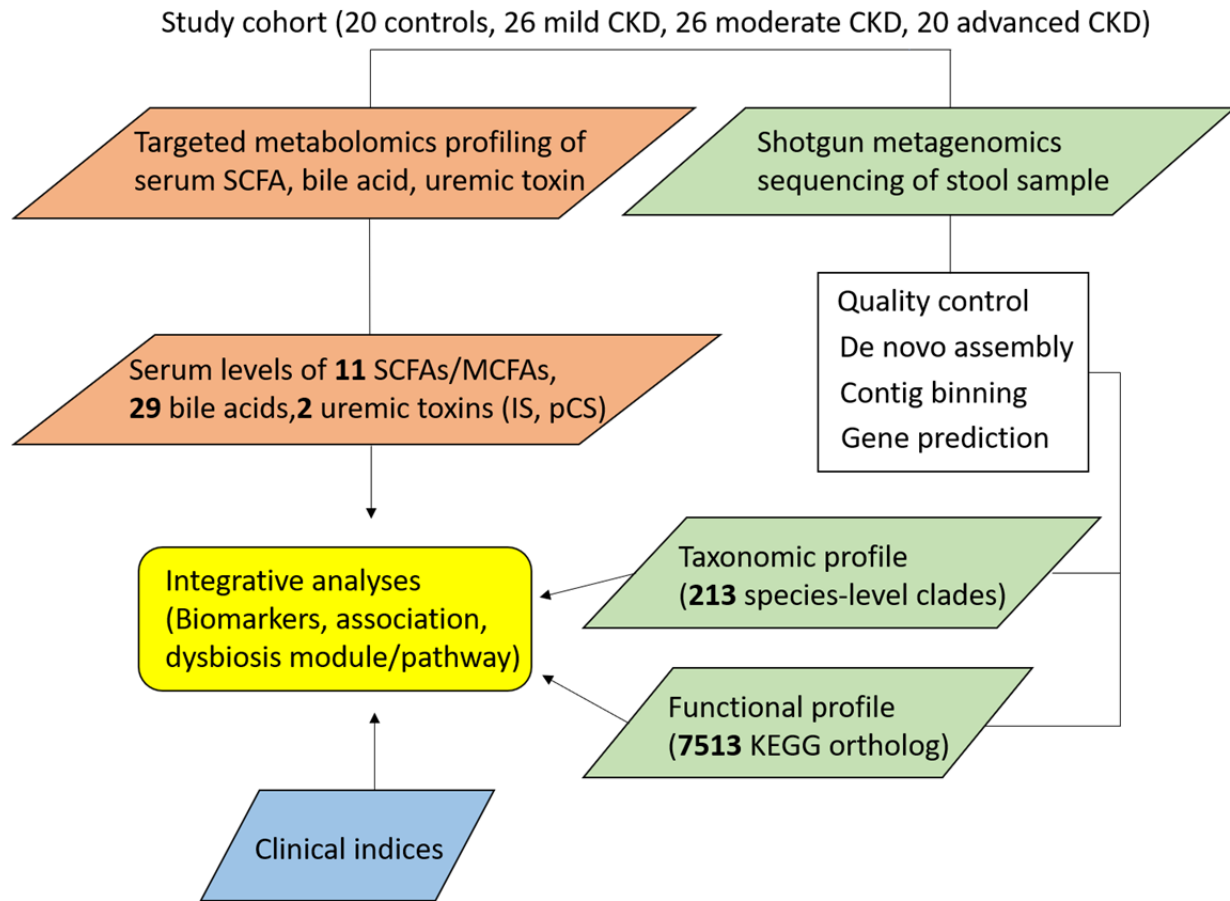

**Supplemental figure 1. Overview of the study.** Stool DNA samples from 92 subjects were used to obtain deep shotgun sequencing data, from which functional and species-level taxonomic profiles were generated. In addition, serum samples were used to conduct targeted metabolomics analysis to generate metabolite profiles. Samples from 92 subjects (20 non-CKD controls, 26 mild CKD, 26 moderate CKD, 20 advanced CKD) were available for both the sequencing and metabolomics data analyses. KEGG, Kyoto Encyclopedia of Genes and Genomes; SCFA, short-chain fatty acid; MCFA, medium-chain fatty acid; IS, indoxyl sulphate; pCS, p-cresyl sulphate.

**A**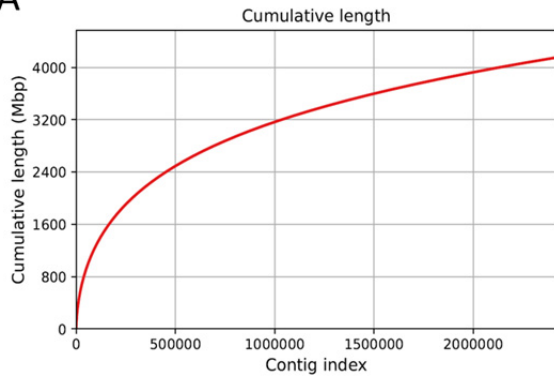**B**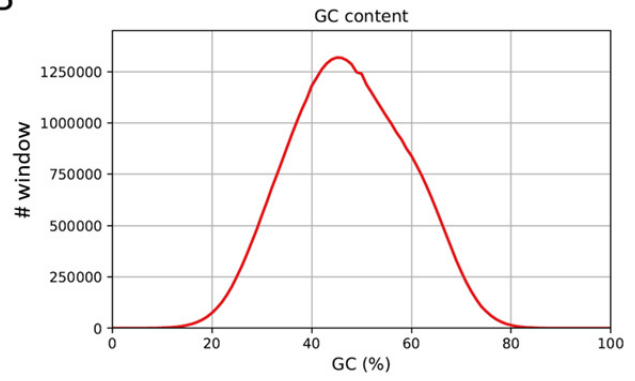

**Supplemental figure 2. (A)** Cumulative length of assembled contigs **(B)** Distribution of GC content of assembled contigs.

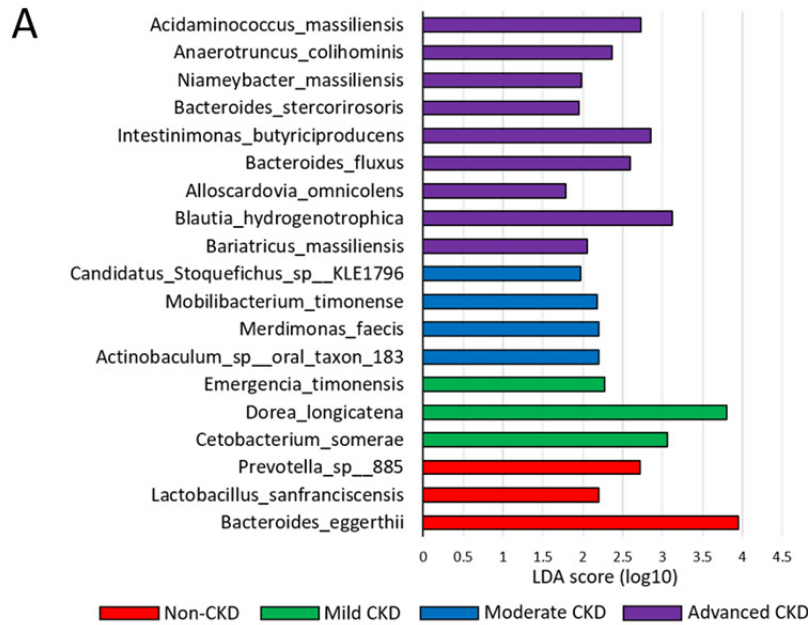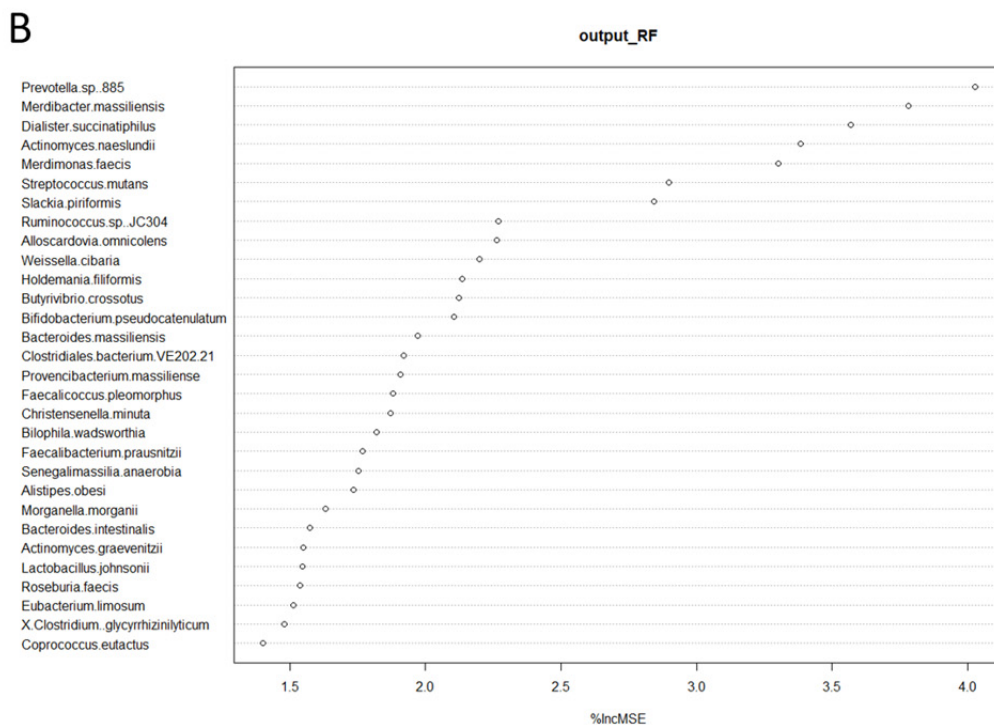

**Supplemental figure 3. Determination of bacterial biomarkers specific for each CKD stage or most discriminatory against the glomerular filtration rate. (A)** Gut microbes that best characterize each CKD group were identified by using linear discriminant analysis of effect size (LEfSe) on species-level abundance tables. **(B)** Species that are most discriminatory against renal dysfunction (glomerular filtration rate) were ranked in descending order of their importance to the accuracy of the model determined by applying Random Forests analysis.

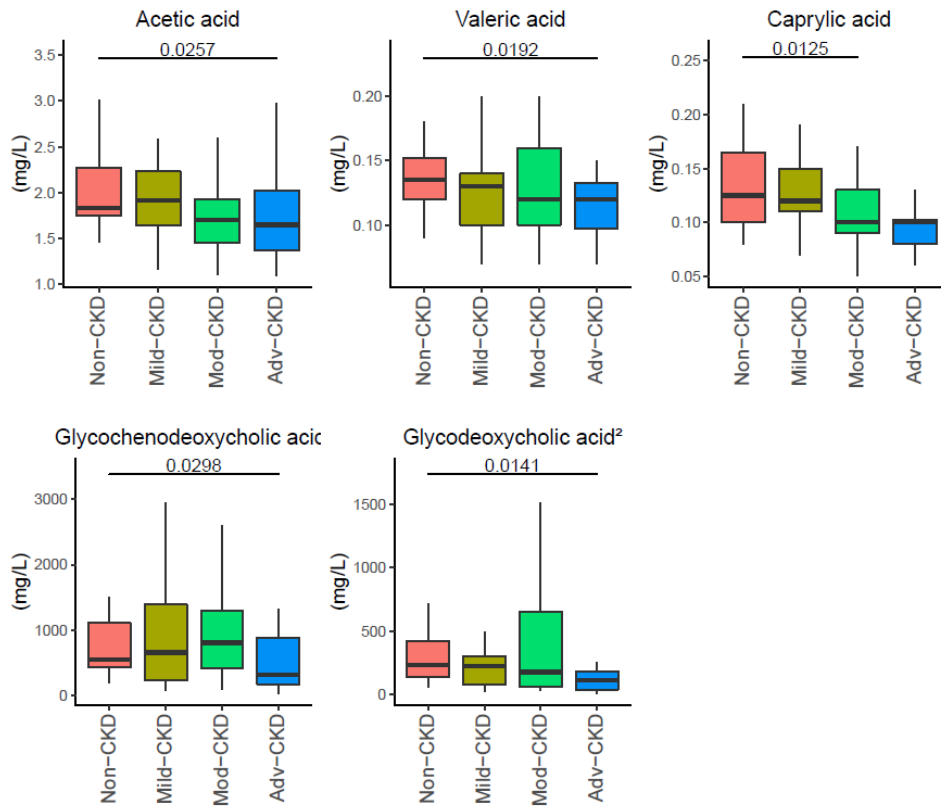

**Supplemental figure 4. Comparison of circulating metabolic signatures across CKD groups.**

Levels of metabolites among different groups were analyzed by Wilcoxon rank sum test.

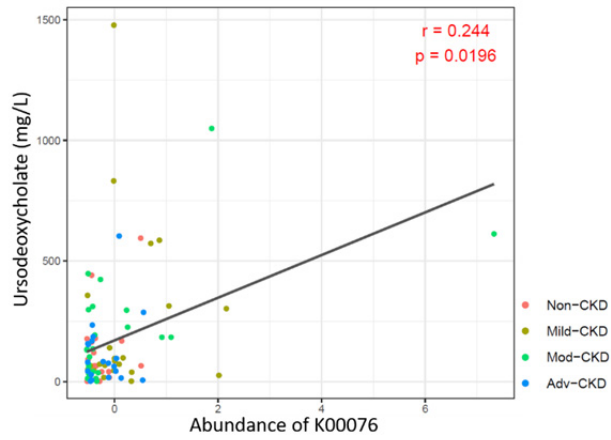

**Supplemental figure 5.** The correlation of ursodeoxycholic acid (Spearman's correlation,  $r = 0.244$ ,  $P = 0.0196$ ) with the abundance of K00076.

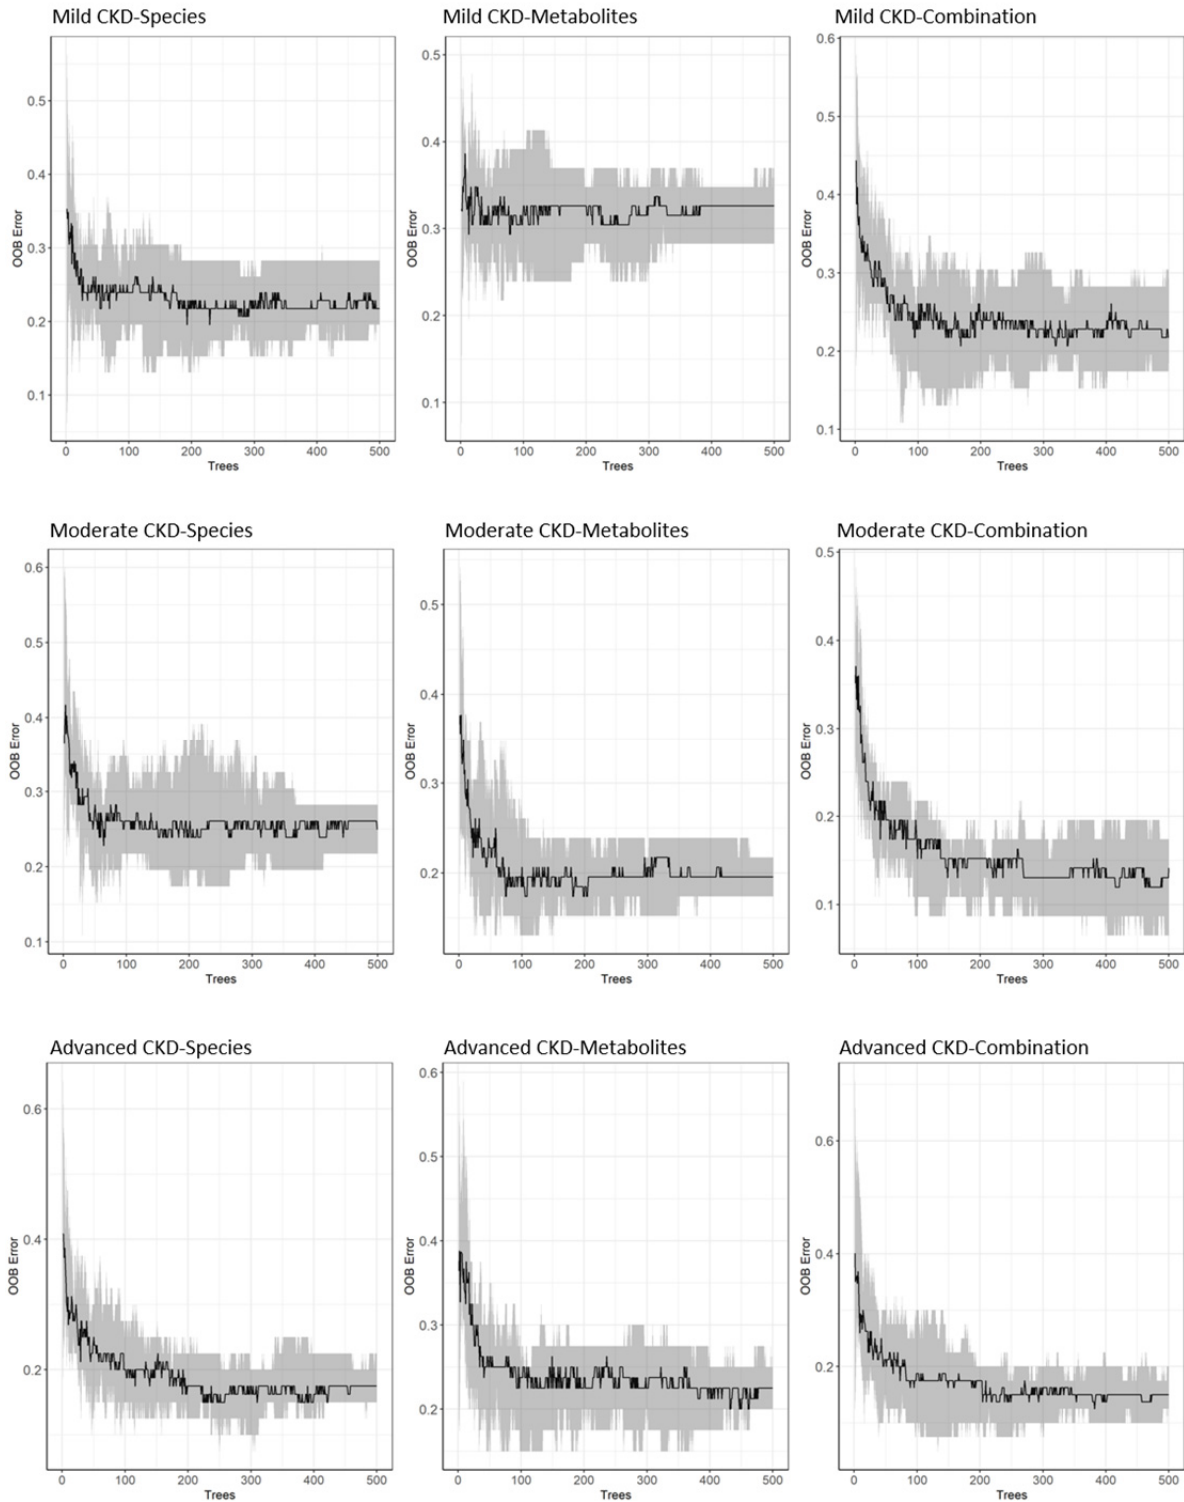

**Supplemental figure 6.** The estimated prediction error rate (out-of-bag error, OOB error) for biomarker changes with the size of the forest (the number of trees). The black lines represent the median of OOB error, and gray bands represent the range of minimum and maximum OOB error.



**A**

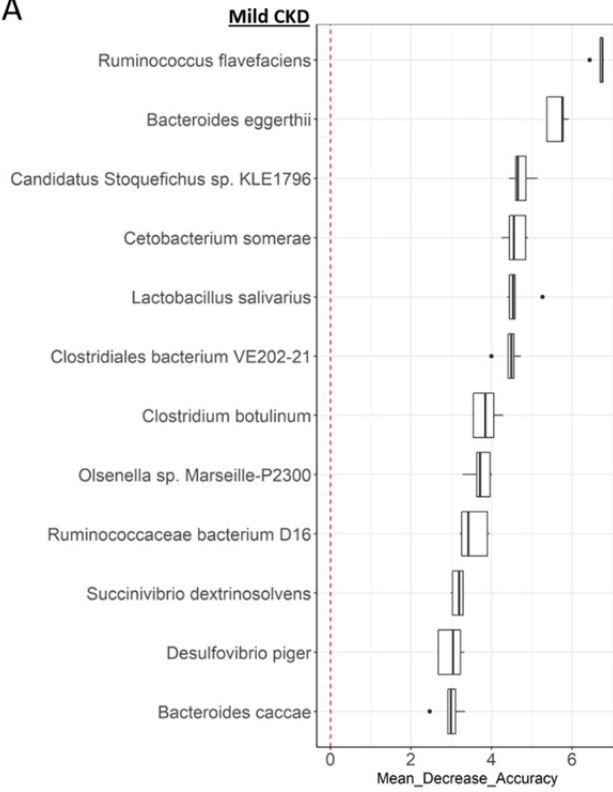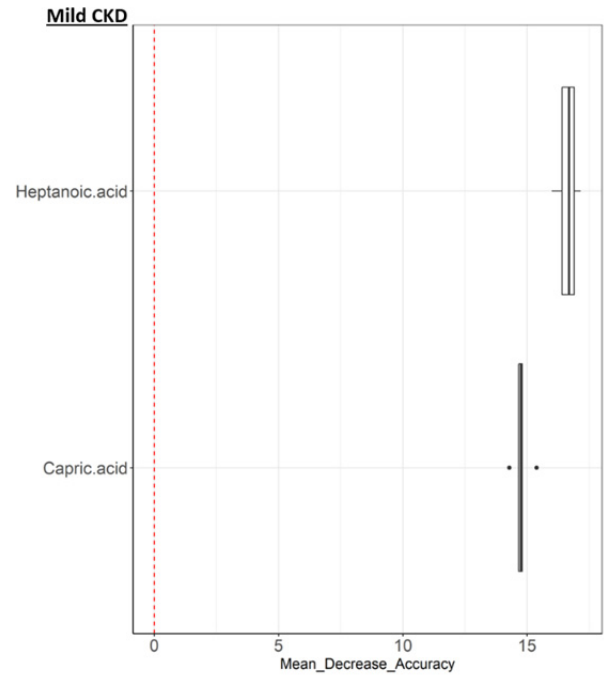

**B**

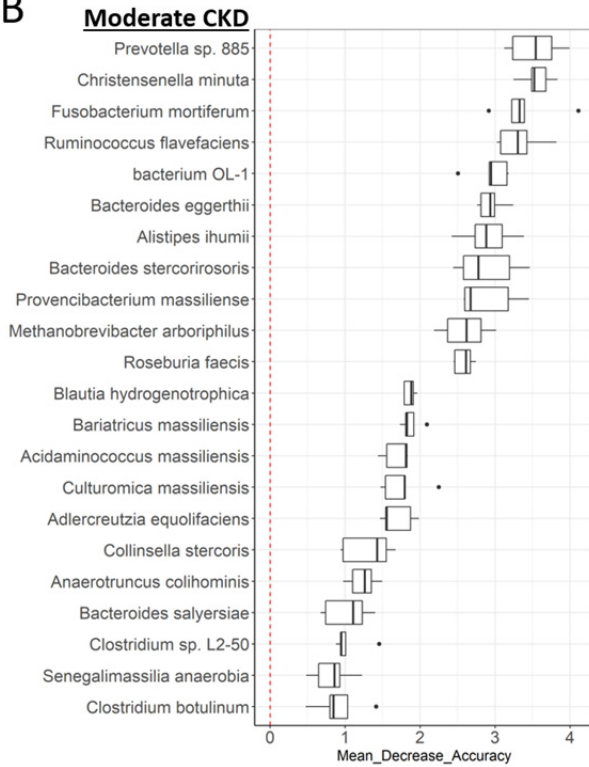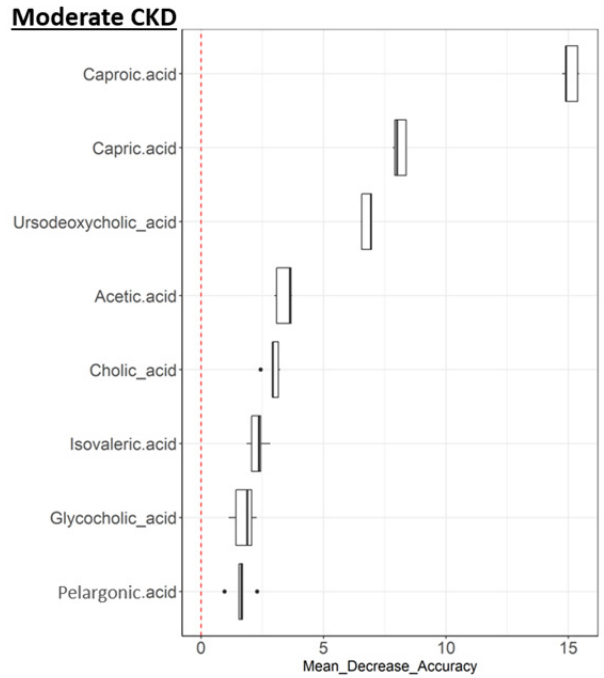

**C**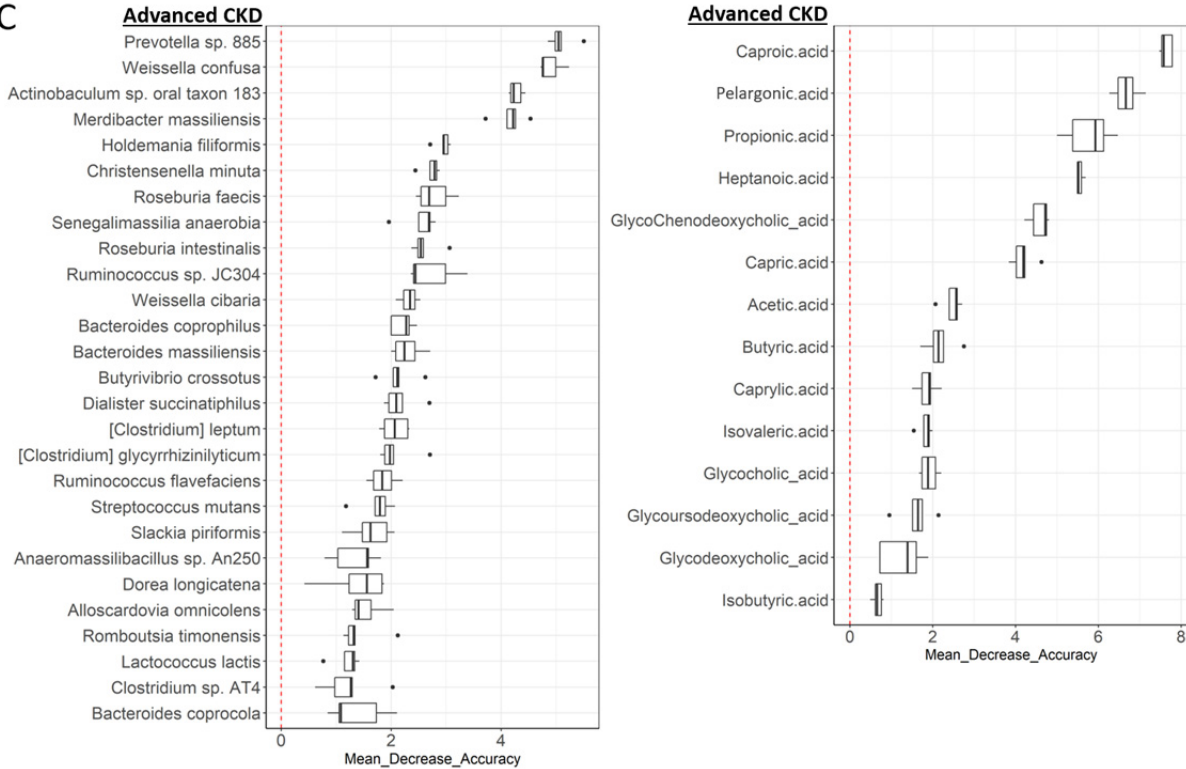

**Supplemental figure 7.** Metagenomic (left) and metabolomic (right) markers for detecting patients with mild (A), moderate (B), and advanced CKD (C) and early-stage CKD identified from Random Forests classifiers based on species-level taxonomic or metabolomic profiles. Markers are ranked in descending order of their importance to the accuracy of the model. The boxes represent 25th–75th percentiles, and black lines indicate the median.

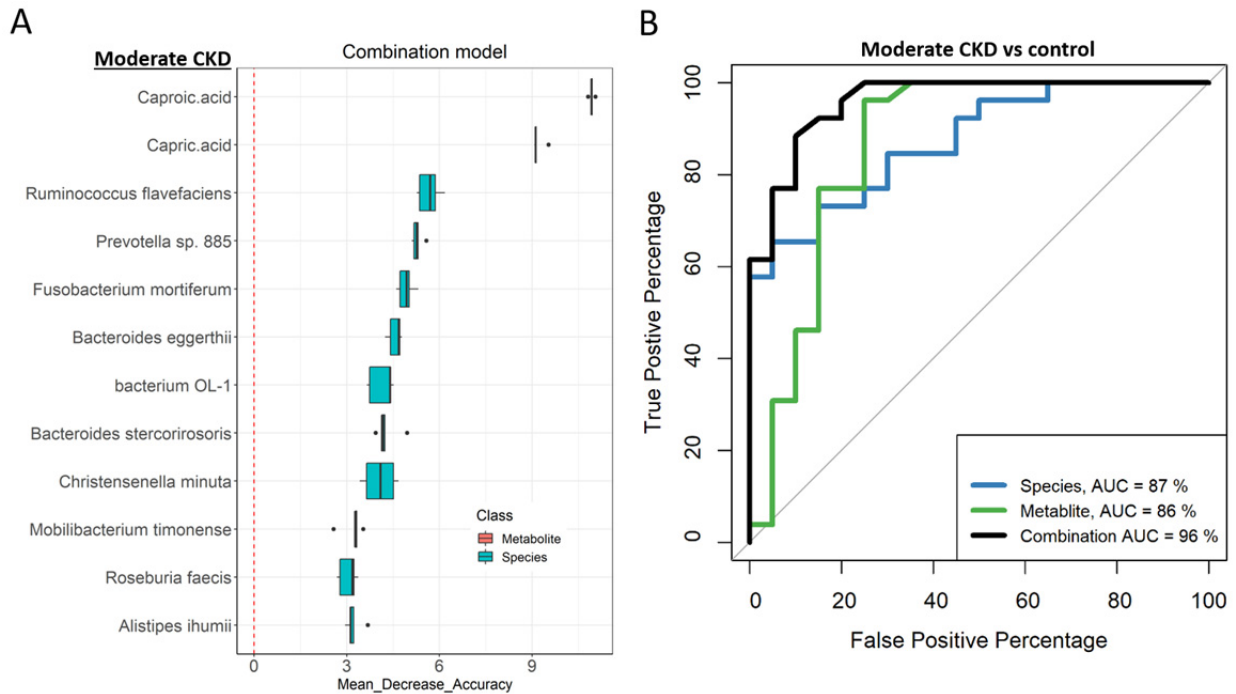

**Supplemental figure 8. (A)** Metagenomic and metabolomic markers for detecting patients with moderate CKD (n=26) from the controls (n=20) identified from Random Forests classifiers based on the combination of dual-omics markers. Markers are ranked in descending order of their importance to the accuracy of the model. The boxes represent 25th–75th percentiles, and black lines indicate the median. **(B)** ROC curves depict trade-offs between true and false positive rates for detecting patients with moderate CKD as classification stringency varies. AUC, the total area under the ROC curve.

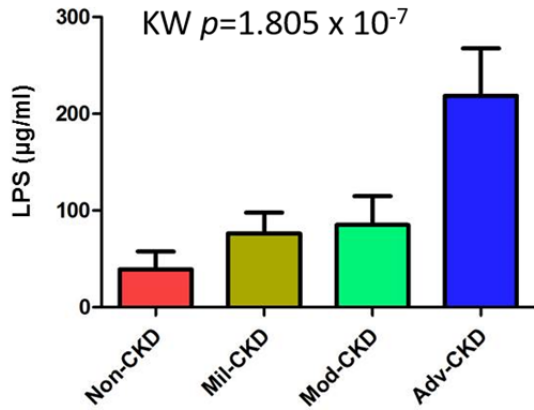

**Supplemental figure 9. Comparison of circulating lipopolysaccharide (LPS) levels across CKD groups.** Significant differences in serum levels of LPS among different groups were analyzed by Kruskal-Wallis test with a p value of  $1.805 \times 10^{-7}$ . Post-hoc P values of Dunn's test of multiple comparisons are 0.0017, 0.0009 and  $<0.0001$  for the comparison of Non-CKD v.s. Mil-CKD, Non-CKD v.s. Mod-CKD and Non-CKD v.s. Adv-CKD, respectively.

**Supplemental table 1. List of bile acids examined in this study.**

| <b>no</b> | <b>Bile acid</b>                  | <b>abbv.</b>    | <b>CAS</b>  | <b>molecular formula</b>                          |
|-----------|-----------------------------------|-----------------|-------------|---------------------------------------------------|
| 1         | Dehydrolithocholic acid           | DHLCA           | 1553-56-6   | C <sub>24</sub> H <sub>38</sub> O <sub>3</sub>    |
| 2         | Allolithocholic acid              | alloLCA         | 2276-93-9   | C <sub>24</sub> H <sub>40</sub> O <sub>3</sub>    |
| 3         | Isolithocholic acid               | isoLCA          | 1534-35-6   | C <sub>24</sub> H <sub>40</sub> O <sub>3</sub>    |
| 4         | Lithocholic acid                  | LCA             | 434-13-9    | C <sub>24</sub> H <sub>40</sub> O <sub>3</sub>    |
| 5         | 23-Nordeoxycholic acid            | 23norDCA        | 53608-86-9  | C <sub>23</sub> H <sub>38</sub> O <sub>4</sub>    |
| 6         | 7-Ketolithocholic acid            | 7-ketoLCA       | 4651-67-6   | C <sub>24</sub> H <sub>38</sub> O <sub>4</sub>    |
| 7         | 12-Ketolithocholic acid           | 12-ketoLCA      | 5130-29-0   | C <sub>24</sub> H <sub>38</sub> O <sub>4</sub>    |
| 8         | Apocholic acid                    | apoCA           | 641-81-6    | C <sub>24</sub> H <sub>38</sub> O <sub>4</sub>    |
| 9         | Ursodeoxycholic acid              | UDCA            | 128-13-2    | C <sub>24</sub> H <sub>40</sub> O <sub>4</sub>    |
| 10        | Hyodeoxycholic acid               | HDCA            | 83-49-8     | C <sub>24</sub> H <sub>40</sub> O <sub>4</sub>    |
| 11        | Chenodeoxycholic acid             | CDCA            | 474-25-9    | C <sub>24</sub> H <sub>40</sub> O <sub>4</sub>    |
| 12        | Deoxycholic acid                  | DCA             | 83-44-3     | C <sub>24</sub> H <sub>40</sub> O <sub>4</sub>    |
| 13        | Isodeoxycholic acid               | isoDCA          | 566-17-6    | C <sub>24</sub> H <sub>40</sub> O <sub>4</sub>    |
| 14        | Dehydrocholic acid                | DHCA            | 81-23-2     | C <sub>24</sub> H <sub>34</sub> O <sub>5</sub>    |
| 15        | 7,12-Diketolithocholic acid       | 7,12-diketoLCA  | 517-33-9    | C <sub>24</sub> H <sub>36</sub> O <sub>5</sub>    |
| 16        | 6,7-Diketolithocholic acid        | 6,7-diketoLCA   | -           | C <sub>24</sub> H <sub>36</sub> O <sub>5</sub>    |
| 17        | 7-Ketodeoxycholic acid            | 7-DHCA          | 911-40-0    | C <sub>24</sub> H <sub>38</sub> O <sub>5</sub>    |
| 18        | 12-Dehydrocholic acid             | 12-DHCA         | 204023      | C <sub>24</sub> H <sub>38</sub> O <sub>5</sub>    |
| 19        | 3-Dehydrocholic acid              | 3-DHCA          | 2304-89-4   | C <sub>24</sub> H <sub>38</sub> O <sub>5</sub>    |
| 20        | Ursocholic acid                   | UCA             | 2955-27-3   | C <sub>24</sub> H <sub>40</sub> O <sub>5</sub>    |
| 21        | $\alpha$ -Muricholic acid         | $\alpha$ -MCA   | 2393-58-0   | C <sub>24</sub> H <sub>40</sub> O <sub>5</sub>    |
| 22        | $\beta$ -Muricholic acid          | $\beta$ -MCA    | 2393-59-1   | C <sub>24</sub> H <sub>40</sub> O <sub>5</sub>    |
| 23        | $\lambda$ -Muricholic acid        | $\lambda$ -MCA  | 547-75-1    | C <sub>24</sub> H <sub>40</sub> O <sub>5</sub>    |
| 24        | Allocholic acid                   | ACA             | 2464-18-8   | C <sub>24</sub> H <sub>40</sub> O <sub>5</sub>    |
| 25        | Cholic acid                       | CA              | 81-25-4     | C <sub>24</sub> H <sub>40</sub> O <sub>5</sub>    |
| 26        | Glycolithocholic acid             | GLCA            | 24404-83-9  | C <sub>26</sub> H <sub>43</sub> NO <sub>4</sub>   |
| 27        | Glycoursodeoxycholic acid         | GUDCA           | 64480-66-6  | C <sub>26</sub> H <sub>43</sub> NO <sub>5</sub>   |
| 28        | Glycohyodeoxycholic acid          | GHDCA           | 38411-84-6  | C <sub>26</sub> H <sub>43</sub> NO <sub>5</sub>   |
| 29        | Glycochenodeoxycholic acid        | GCDCA           | 16564-43-5  | C <sub>26</sub> H <sub>43</sub> NO <sub>5</sub>   |
| 30        | Glycodeoxycholic acid             | GDCA            | 16409-34-0  | C <sub>26</sub> H <sub>43</sub> NO <sub>5</sub>   |
| 31        | Glycodehydrocholic acid           | GDHCA           | 3415-45-0   | C <sub>26</sub> H <sub>37</sub> NO <sub>6</sub>   |
| 32        | Glyco- $\lambda$ -muricholic acid | G $\lambda$ MCA | -           | C <sub>26</sub> H <sub>43</sub> NO <sub>6</sub>   |
| 33        | Glycocholic acid                  | GCA             | 475-31-0    | C <sub>26</sub> H <sub>43</sub> NO <sub>6</sub>   |
| 34        | Taurolithocholic acid             | TLCA            | 6042-32-6   | C <sub>26</sub> H <sub>45</sub> NO <sub>5</sub> S |
| 35        | Tauroursodeoxycholic acid         | TUDCA           | 14605-22-2  | C <sub>26</sub> H <sub>45</sub> NO <sub>6</sub> S |
| 36        | Taurohyodeoxycholic acid          | THDCA           | 110026-03-4 | C <sub>26</sub> H <sub>45</sub> NO <sub>6</sub> S |
| 37        | Taurochenodeoxycholic acid        | TCDCa           | 516-35-8    | C <sub>26</sub> H <sub>45</sub> NO <sub>6</sub> S |

|           |                                 |                  |            |            |
|-----------|---------------------------------|------------------|------------|------------|
| <b>38</b> | Taurodeoxycholic acid           | TDCA             | 1180-95-6  | C26H45NO6S |
| <b>39</b> | Tauro $\alpha$ -Muricholic acid | T- $\alpha$ -MCA | 25696-60-0 | C26H45NO7S |
| <b>40</b> | Tauro $\beta$ -Muricholic acid  | T- $\beta$ -MCA  | -          | C26H45NO7S |
| <b>41</b> | Taurocholic acid                | TCA              | 81-24-3    | C26H45NO7S |

**Supplemental table 2. Time table-UHPLC-MS**

|    | <b>Time</b> | <b>A (H2O)</b> | <b>B (ACN)</b> | <b>Flow</b> |
|----|-------------|----------------|----------------|-------------|
| 1  | 0.0 min     | 75.0%          | 25.0%          | 0.40 mL/min |
| 2  | 5.0 min     | 74.2%          | 25.8%          | 0.40 mL/min |
| 3  | 5.5 min     | 71.5%          | 28.5%          | 0.40 mL/min |
| 4  | 10.0 min    | 71.0%          | 29.0%          | 0.40 mL/min |
| 5  | 12.0 min    | 64.0%          | 36.0%          | 0.40 mL/min |
| 6  | 26.0 min    | 32.5%          | 67.5%          | 0.40 mL/min |
| 7  | 26.2 min    | 1.0%           | 99.0%          | 0.40 mL/min |
| 8  | 28.2 min    | 1.0%           | 99.0%          | 0.40 mL/min |
| 9  | 28.4 min    | 75.0%          | 25.0%          | 0.40 mL/min |
| 10 | 32.0 min    | 75.0%          | 25.0%          | 0.40 mL/min |

**Supplemental table 3. Statistics of assembled contigs**

|                                 |            |
|---------------------------------|------------|
| # contigs ( $\geq$ 0 bp)        | 4685777    |
| # contigs ( $\geq$ 1000 bp)     | 1037907    |
| # contigs ( $\geq$ 5000 bp)     | 129084     |
| # contigs ( $\geq$ 10000 bp)    | 43346      |
| # contigs ( $\geq$ 25000 bp)    | 7483       |
| # contigs ( $\geq$ 50000 bp)    | 1605       |
| Total length ( $\geq$ 0 bp)     | 4975626734 |
| Total length ( $\geq$ 1000 bp)  | 3205419465 |
| Total length ( $\geq$ 5000 bp)  | 1435890325 |
| Total length ( $\geq$ 10000 bp) | 849684732  |
| Total length ( $\geq$ 25000 bp) | 326479799  |
| Total length ( $\geq$ 50000 bp) | 130480093  |
| # contigs                       | 2420440    |
| Largest contig                  | 816575     |
| Total length                    | 4153936351 |
| GC (%)                          | 47.45      |
| N50                             | 2650       |
| N75                             | 1075       |
| L50                             | 309392     |
| L75                             | 951083     |
| # N's per 100 kbp               | 0.00       |

All statistics are based on contigs of size  $\geq$ 500 bp unless otherwise indicated.

**Supplemental table 4. Annotation results of phylogenetic bins.**

|                       | <b>Kingdom</b> | <b>Phylum</b> | <b>Class</b> | <b>Order</b> | <b>Family</b> | <b>Genus</b> | <b>Species</b> |
|-----------------------|----------------|---------------|--------------|--------------|---------------|--------------|----------------|
| <b>Annotated bin#</b> | 2              | 25            | 6            | 175          | 144           | 195          | 357            |
| <b>Unique taxa#</b>   | 1              | 8             | 14           | 20           | 39            | 102          | 213            |
